# Supplementary material for: ACE2 Serum Levels as Predictor of Infectability and Outcome in COVID-19
Source: PubMed Central journal article supplement (PMC8986157; doi:10.3389/fimmu.2022.836516), 2022-03-23
Supplement: Table_1.pdf [file Table_1.pdf]

| <b>Cod</b> | <b>Age</b> | <b>Sex</b> | <b>Classification</b> | <b>Severity of symptoms</b> | <b>Type of symptoms</b> | <b>ACE2 (ng/ml)</b> | <b>anti S IgG1 antibodies (mean of fluorescence)</b> | <b>Ang2 (pg/ml)</b> | <b>ACE2/Ang2 ratio</b> |
|------------|------------|------------|-----------------------|-----------------------------|-------------------------|---------------------|------------------------------------------------------|---------------------|------------------------|
| 849        | 49         | F          | Exposed Seropositive  | Asymptomatics               | Asymptomatics           | 5,68                | 1082                                                 | 9,52                | 0,60                   |
| 824        | 41         | M          | Exposed Seropositive  | Asymptomatics               | Asymptomatics           | 16,56               | 146                                                  | 3,82                | 4,33                   |
| 210        | 54         | F          | Exposed Seropositive  | Asymptomatics               | Asymptomatics           | 20,46               | 2990                                                 | 29,49               | 0,69                   |
| CC42       | 44         | F          | Exposed Seropositive  | Asymptomatics               | Asymptomatics           | na                  | 2698                                                 | 1,54                |                        |
| 174        | 49         | M          | Exposed Seropositive  | MILD                        | UR1                     | 6,52                | 442                                                  | 22,92               | 0,28                   |
| 819        | 87         | F          | Exposed Seropositive  | MILD                        | UR1                     | 14,09               | 2089                                                 | 1,82                | 7,73                   |
| 138        | 36         | F          | Exposed Seropositive  | MILD                        | UR1                     | 14,65               | 1080                                                 | 4,20                | 3,49                   |
| 1068       | 33         | M          | Exposed Seropositive  | MILD                        | Gastrointestinal        | 2,13                | 345                                                  | 18,69               | 0,11                   |
| 1115       | 59         | F          | Exposed Seropositive  | MILD                        | Gastrointestinal        | 2,48                | 1046                                                 | 6,07                | 0,41                   |
| 1139       | 58         | M          | Exposed Seropositive  | MILD                        | Gastrointestinal        | 3,52                | 1887                                                 | 12,33               | 0,29                   |
| 296        | 57         | M          | Exposed Seropositive  | MILD                        | UR1                     | 5,5                 | 1169                                                 | 42,55               | 0,13                   |
| 253        | 27         | M          | Exposed Seropositive  | MILD                        | UR1                     | 6,48                | 1098                                                 | 5,20                | 1,25                   |
| 190        | 47         | M          | Exposed Seropositive  | MILD                        | UR1                     | 7,55                | 805                                                  | 29,61               | 0,25                   |

|      |    |   |                      |          |                  |       |      |       |       |
|------|----|---|----------------------|----------|------------------|-------|------|-------|-------|
| 198  | 33 | F | Exposed Seropositive | MILD     | UR1              | 8,75  | 133  | 8,14  | 1,07  |
| CBM1 | 37 | F | Exposed Seropositive | MILD     | UR1              | 10,8  | 49,2 | na    |       |
| 242  | 48 | M | Exposed Seropositive | MILD     | UR1              | 10,89 | 75,1 | 62,64 | 0,17  |
| 158  | 47 | M | Exposed Seropositive | MILD     | UR1              | 11,65 | 320  | 39,24 | 0,30  |
| PE12 | 41 | F | Exposed Seropositive | MILD     | UR1              | 12,8  | 1938 | 1,01  | 12,71 |
| 244  | 40 | M | Exposed Seropositive | MILD     | UR1              | 13,62 | 1442 | 21,31 | 0,64  |
| NS39 | 43 | F | Exposed Seropositive | MILD     | UR1              | 16,73 | 1376 | 1,16  | 14,42 |
| 241  | 60 | M | Exposed Seropositive | MILD     | UR1              | 19,32 | 2022 | 47,39 | 0,41  |
| 172  | 52 | M | Exposed Seropositive | MODERATE | Cutaneous        | 10,16 | 1333 | 81,58 | 0,12  |
| 682  | 29 | F | Exposed Seropositive | MODERATE | Cutaneous        | 10,89 | 1131 | 2,91  | 3,75  |
| 1081 | 41 | M | Exposed Seropositive | MODERATE | Gastrointestinal | 1,7   | 589  | 36,25 | 0,05  |
| 569  | 53 | M | Exposed Seropositive | MODERATE | Gastrointestinal | 3,17  | 1625 | 7,48  | 0,42  |
| 877  | 40 | F | Exposed Seropositive | MODERATE | Gastrointestinal | 5,43  | 46,8 | 1,47  | 3,69  |
| 153  | 48 | M | Exposed Seropositive | MODERATE | Gastrointestinal | 11,71 | 1262 | 30,22 | 0,39  |
| 771  | 39 | M | Exposed Seropositive | MODERATE | Gastrointestinal | 14,55 | 158  | 8,20  | 1,77  |

|      |    |   |                         |               |                  |       |      |       |      |
|------|----|---|-------------------------|---------------|------------------|-------|------|-------|------|
| 561  | 33 | F | Exposed Seropositive    | MODERATE      | Gastrointestinal | 18,35 | 1625 | 2,55  | 7,20 |
| 785  | 60 | M | Exposed Seropositive    | MODERATE      | Pneumonia        | 4,55  | 2004 | 4,81  | 0,95 |
| EM6  | 54 | F | Exposed Seropositive    | MODERATE      | UR2              | 10,16 | 2054 | 54,82 | 0,19 |
| 161  | 47 | F | Exposed Seropositive    | MODERATE      | UR2              | 12,79 | 738  | 6,42  | 1,99 |
| 11   | 54 | F | Exposed Seropositive    | MODERATE      | UR2              | 17,91 | 1615 | 17,06 | 1,05 |
| 176  | 47 | F | Exposed Seropositive    | SEVERE        | Cutaneous        | 11,57 | 464  | 17,84 | 0,65 |
| 286  | 42 | M | Exposed Seropositive    | SEVERE        | Cutaneous        | 15,22 | 147  | 60,16 | 0,25 |
| 248  | 41 | F | Exposed Seropositive    | SEVERE        | Gastrointestinal | 4,3   | 1249 | 12,84 | 0,33 |
| 690  | 46 | F | Exposed Seropositive    | SEVERE        | Gastrointestinal | 6,9   | 1292 | 5,53  | 1,25 |
| 421  | 54 | M | Exposed Seropositive    | SEVERE        | UR2              | 4,47  | 1623 | 10,12 | 0,44 |
| 834  | 46 | M | Exposed Seropositive    | SEVERE        | UR2              | 7,27  | 2769 | 5,81  | 1,25 |
| 386  | 47 | F | Exposed Seropositive    | SEVERE        | Cutaneous        | 11,01 | 588  | 2,18  | 5,06 |
| MU9  | 30 | F | Exposed Seropositive    | SEVERE        | Pneumonia        | 6,82  | 1670 | 3,95  | 1,73 |
| 844  | 57 | F | Cohabiting seropositive | Asymptomatics | Asymptomatics    | 3,64  | 2398 | 37,03 | 0,10 |
| 1142 | 63 | F | Cohabiting seropositive | Asymptomatics | Asymptomatics    | 5,88  | 1144 | 3,24  | 1,81 |

|      |    |   |                         |               |                  |       |      |       |      |
|------|----|---|-------------------------|---------------|------------------|-------|------|-------|------|
| 770  | 68 | F | Cohabiting seropositive | Asymptomatics | Asymptomatics    | 6,82  | 1356 | 1,34  | 5,08 |
| 1127 | 15 | M | Cohabiting seropositive | Asymptomatics | Asymptomatics    | 9,81  | 2330 | 4,33  | 2,26 |
| 1126 | 12 | M | Cohabiting seropositive | Asymptomatics | Asymptomatics    | 10,05 | 1540 | 30,46 | 0,33 |
| 814  | 37 | M | Cohabiting seropositive | Asymptomatics | Asymptomatics    | 12,34 | 3601 | 6,65  | 1,86 |
| 305  | 14 | M | Cohabiting seropositive | Asymptomatics | Asymptomatics    | 18,87 | 1239 | 4,07  | 4,63 |
| 1183 | 25 | F | Cohabiting seropositive | MILD          | Cutaneous        | 14,73 | 549  | 3,82  | 3,86 |
| 813  | 55 | M | Cohabiting seropositive | MILD          | UR1              | 3,18  | 2675 | 3,07  | 1,04 |
| 812  | 75 | M | Cohabiting seropositive | MILD          | UR1              | 6,35  | 2508 | 2,45  | 2,59 |
| 818  | 63 | M | Cohabiting seropositive | MILD          | UR1              | 8,41  | 1012 | 14,38 | 0,58 |
| 128  | 18 | F | Cohabiting seropositive | MILD          | UR1              | 17,24 | 842  | 3,00  | 5,75 |
| 517  | 68 | F | Cohabiting seropositive | MILD          | Gastrointestinal | 6,73  | 2193 | 3,29  | 2,04 |
| 2    | 65 | F | Cohabiting seropositive | MILD          | Gastrointestinal | 7,91  | 1685 | 4,60  | 1,72 |
| 225  | 37 | M | Cohabiting seropositive | MILD          | UR1              | 5,77  | 2188 | 3,74  | 1,54 |
| 786  | 50 | F | Cohabiting seropositive | MILD          | UR1              | 7,31  | 971  | 7,83  | 0,93 |
| 1049 | 54 | F | Cohabiting seropositive | MILD          | UR1              | 9,57  | 2715 | 7,03  | 1,36 |

|      |    |   |                         |          |                  |       |      |       |      |
|------|----|---|-------------------------|----------|------------------|-------|------|-------|------|
| 984  | 68 | F | Cohabiting seropositive | MILD     | UR1              | 9,69  | 1787 | 1,75  | 5,54 |
| 245  | 34 | M | Cohabiting seropositive | MILD     | UR1              | 10,17 | 2977 | 5,70  | 1,78 |
| MU10 | 27 | M | Cohabiting seropositive | MILD     | UR2              | 5,5   | 573  | 4,93  | 1,12 |
| 603  | 44 | M | Cohabiting seropositive | MODERATE | Gastrointestinal | 4,04  | 552  | 7,23  | 0,56 |
| 127  | 50 | F | Cohabiting seropositive | MODERATE | Gastrointestinal | 4,79  | 559  | 2,46  | 1,95 |
| 821  | 62 | M | Cohabiting seropositive | MODERATE | Gastrointestinal | 7,31  | 1262 | 4,10  | 1,78 |
| 1034 | 61 | M | Cohabiting seropositive | MODERATE | Gastrointestinal | 11,15 | 1472 | 9,25  | 1,21 |
| 278  | 38 | F | Cohabiting seropositive | MODERATE | Gastrointestinal | 16,32 | 872  | 2,29  | 7,14 |
| 252  | 39 | M | Cohabiting seropositive | MODERATE | Gastrointestinal | 18,25 | 1149 | 7,71  | 2,37 |
| 782  | 43 | F | Cohabiting seropositive | MODERATE | UR2              | 4,32  | 2515 | 50,56 | 0,09 |
| 799  | 35 | M | Cohabiting seropositive | MODERATE | UR2              | 6,99  | 1584 | 4,13  | 1,69 |
| 1734 | 35 | M | Cohabiting seropositive | SEVERE   | Gastrointestinal | 2,13  | 1802 | 23,28 | 0,09 |
| 622  | 67 | F | Cohabiting seropositive | SEVERE   | Gastrointestinal | 2,57  | 2041 | 2,64  | 0,97 |
| 624  | 59 | F | Cohabiting seropositive | SEVERE   | Gastrointestinal | 2,65  | 1184 | 7,83  | 0,34 |
| 277  | 40 | M | Cohabiting seropositive | SEVERE   | Gastrointestinal | 3,78  | 1417 | 13,08 | 0,29 |

|      |    |    |                                 |          |                  |       |      |       |      |
|------|----|----|---------------------------------|----------|------------------|-------|------|-------|------|
| 735  | 28 | F  | Cohabiting seropositive         | SEVERE   | Gastrointestinal | 4,04  | 658  | 3,81  | 1,06 |
| 852  | 50 | M  | Cohabiting seropositive         | SEVERE   | Gastrointestinal | 8,18  | 3114 | 6,17  | 1,33 |
| 1050 | 45 | F  | Cohabiting seropositive         | SEVERE   | Gastrointestinal | 10,05 | 185  | 6,74  | 1,49 |
| 518  | 70 | M  | Cohabiting seropositive         | SEVERE   | Gastrointestinal | 13,75 | 2282 | 13,79 | 1,00 |
| 820  | 64 | F  | Cohabiting seropositive         | SEVERE   | Pneumonia        | 7,19  | 4145 | 2,55  | 2,82 |
| 742  | 49 | M  | Cohabiting seropositive         | SEVERE   | Pneumonia        | 7,43  | 1942 | 70,63 | 0,11 |
| 275  | 66 | F  | Cohabiting seropositive         | SEVERE   | Gastrointestinal | 4,47  | 2066 | 1,56  | 2,87 |
| 1128 | 55 | M  | Cohabiting seropositive         | SEVERE   | Pneumonia        | 8,14  | 3418 | 6,09  | 1,34 |
| 8    | na | na | Cohabiting seropositive         | na       | na               | 6,238 | 2644 | 29,69 | 0,21 |
| 9    | na | na | Cohabiting seropositive         | na       | na               | 6,595 | 1755 | 24,72 | 0,27 |
| 1    | na | na | Cohabiting seropositive         | na       | na               | 9,33  | 2769 | 39,51 | 0,24 |
| 740  | na | na | Cohabiting seropositive         | na       | na               | 9,333 | 2667 | 1,63  | 5,74 |
| 739  | na | na | Cohabiting seropositive         | na       | na               | 13,38 | 2769 | 1,40  | 9,54 |
| 169  | 54 | F  | Highly exposed HCW seronegative | MODERATE | Cutaneous        | 15,86 | 345  | 13,03 | 1,22 |

|       |    |   |                                 |               |               |        |      |       |       |
|-------|----|---|---------------------------------|---------------|---------------|--------|------|-------|-------|
| 151   | 47 | M | Highly exposed HCW seronegative | MILD          | Cutaneous     | 15,48  | 130  | 83,36 | 0,19  |
| 126   | 63 | F | Highly exposed HCW seronegative | MILD          | Cutaneous     | 24,95  | 225  | 1,33  | 18,83 |
| 199   | 45 | F | Highly exposed HCW seronegative | Asymptomatics | Asymptomatics | 16,81  | 149  | 3,85  | 4,37  |
| 206   | 41 | F | Highly exposed HCW seronegative | Asymptomatics | Asymptomatics | 15,32  | 93,8 | 5,85  | 2,62  |
| 109   | 40 | M | Highly exposed HCW seronegative | Asymptomatics | Asymptomatics | 24,35  | 122  | 4,42  | 5,51  |
| PM    | 43 | M | Highly exposed HCW seronegative | Asymptomatics | Asymptomatics | 27,32  | 104  | 2,38  | 11,47 |
| RYC14 | 31 | F | Highly exposed HCW seronegative | Asymptomatics | Asymptomatics | 10,048 | 143  | na    |       |
| RYC15 | 53 | F | Highly exposed HCW seronegative | Asymptomatics | Asymptomatics | 10,048 | 190  | na    |       |
| RYC18 | 50 | F | Highly exposed HCW seronegative | Asymptomatics | Asymptomatics | 13,857 | 190  | na    |       |
| RYC21 | 57 | F | Highly exposed HCW seronegative | Asymptomatics | Asymptomatics | 11     | 150  | na    |       |

|       |    |   |                                 |               |               |        |      |        |      |
|-------|----|---|---------------------------------|---------------|---------------|--------|------|--------|------|
| RYC24 | 34 | F | Highly exposed HCW seronegative | Asymptomatics | Asymptomatics | 11,476 | 255  | na     |      |
| RYC25 | 36 | M | Highly exposed HCW seronegative | Asymptomatics | Asymptomatics | 16,476 | 164  | 121,38 | 0,14 |
| RYC43 | 48 | F | Highly exposed HCW seronegative | Asymptomatics | Asymptomatics | 12,19  | 177  | na     |      |
| RYC44 | 48 | F | Highly exposed HCW seronegative | Asymptomatics | Asymptomatics | 10,405 | 148  | 68,82  | 0,15 |
| RYC45 | 51 | F | Highly exposed HCW seronegative | Asymptomatics | Asymptomatics | 11,595 | 158  | na     |      |
| RYC46 | 42 | F | Highly exposed HCW seronegative | Asymptomatics | Asymptomatics | 11,476 | 205  | na     |      |
| RYC47 | 35 | M | Highly exposed HCW seronegative | Asymptomatics | Asymptomatics | 13,857 | 164  | na     |      |
| RYC50 | 30 | M | Highly exposed HCW seronegative | Asymptomatics | Asymptomatics | 12,548 | 159  | na     |      |
| RYC51 | 38 | F | Highly exposed HCW seronegative | Asymptomatics | Asymptomatics | 11,476 | 160  | na     |      |
| RYC52 | 28 | F | Highly exposed HCW seronegative | Asymptomatics | Asymptomatics | 23,976 | 1151 | na     |      |



|       |    |   |                                 |               |               |        |     |       |      |
|-------|----|---|---------------------------------|---------------|---------------|--------|-----|-------|------|
| RYC53 | 40 | F | Highly exposed HCW seronegative | Asymptomatics | Asymptomatics | 14,333 | 188 | 29,83 | 0,48 |
| RYC54 | 44 | F | Highly exposed HCW seronegative | Asymptomatics | Asymptomatics | 16,238 | 191 | na    |      |
| RYC55 | 55 | M | Highly exposed HCW seronegative | Asymptomatics | Asymptomatics | 11,357 | 332 | na    |      |
| RYC56 | 28 | F | Highly exposed HCW seronegative | Asymptomatics | Asymptomatics | 10,405 | 202 | na    |      |
| RYC57 | 37 | F | Highly exposed HCW seronegative | Asymptomatics | Asymptomatics | 14,571 | 186 | 25,93 | 0,56 |
| RYC58 | 40 | M | Highly exposed HCW seronegative | Asymptomatics | Asymptomatics | 13,857 | 538 | na    |      |
| RYC60 | 37 | F | Highly exposed HCW seronegative | Asymptomatics | Asymptomatics | 14,214 | 183 | na    |      |
| RYC62 | 36 | F | Highly exposed HCW seronegative | Asymptomatics | Asymptomatics | 12,31  | 279 | na    |      |
| RYC63 | 49 | F | Highly exposed HCW seronegative | Asymptomatics | Asymptomatics | 16,238 | 225 | na    |      |
| RYC64 | 49 | F | Highly exposed HCW seronegative | Asymptomatics | Asymptomatics | 12,429 | 176 | 28,76 | 0,43 |

|       |    |   |                                 |               |               |        |      |        |       |
|-------|----|---|---------------------------------|---------------|---------------|--------|------|--------|-------|
| RYC65 | 44 | F | Highly exposed HCW seronegative | Asymptomatics | Asymptomatics | 14,095 | 961  | na     |       |
| RYC66 | 57 | F | Highly exposed HCW seronegative | Asymptomatics | Asymptomatics | 18,857 | 151  | na     |       |
| RYC69 | 41 | M | Highly exposed HCW seronegative | Asymptomatics | Asymptomatics | 13,381 | 164  | 112,85 | 0,12  |
| RYC70 | 35 | F | Highly exposed HCW seronegative | Asymptomatics | Asymptomatics | 9,929  | 133  | na     |       |
| RYC71 | 38 | F | Highly exposed HCW seronegative | Asymptomatics | Asymptomatics | 15,643 | 140  | 57,46  | 0,27  |
| RYC72 | 58 | F | Highly exposed HCW seronegative | Asymptomatics | Asymptomatics | 13,381 | 167  | na     |       |
| 784   | 48 | F | Cohabiting seronegative         | MODERATE      | UR2           | 12,5   | 154  | 2,65   | 4,71  |
| 1077  | 66 | M | Cohabiting seronegative         | --            | --            | 9,93   | 1947 | 156,43 | 0,06  |
| 769   | 34 | F | Cohabiting seronegative         | --            | --            | 10,23  | 191  | 13,80  | 0,74  |
| 970   | 10 | M | Cohabiting seronegative         | --            | --            | 10,64  | 235  | 0,53   | 20,06 |
| 713   | 41 | M | Cohabiting seronegative         | --            | --            | 10,88  | 235  | 23,89  | 0,46  |
| 801   | 48 | M | Cohabiting seronegative         | --            | --            | 11,14  | 180  | 8,88   | 1,25  |

|     |    |   |                         |    |    |       |      |       |       |
|-----|----|---|-------------------------|----|----|-------|------|-------|-------|
| 822 | 29 | M | Cohabiting seronegative | -- | -- | 11,36 | 189  | 3,50  | 3,25  |
| 787 | 52 | M | Cohabiting seronegative | -- | -- | 11,83 | 127  | 21,24 | 0,56  |
| 853 | 49 | F | Cohabiting seronegative | -- | -- | 12,43 | 120  | 5,15  | 2,41  |
| EF1 | 60 | F | Cohabiting seronegative | -- | -- | 14,08 | 142  | 29,91 | 0,47  |
| 738 | 45 | F | Cohabiting seronegative | -- | -- | 14,33 | 587  | 1,51  | 9,47  |
| 779 | 64 | M | Unexposed seronegative  | -- | -- | 15    | 136  | 18,39 | 0,82  |
| 211 | 35 | M | Cohabiting seronegative | -- | -- | 15,68 | 188  | 5,23  | 3,00  |
| 748 | 69 | M | Cohabiting seronegative | -- | -- | 15,83 | 64,8 | 5,05  | 3,14  |
| 322 | 44 | F | Cohabiting seronegative | -- | -- | 16,57 | 185  | 3,82  | 4,34  |
| 823 | 33 | F | Cohabiting seronegative | -- | -- | 18,45 | 1296 | 0,70  | 26,45 |
| 816 | 54 | M | Cohabiting seronegative | -- | -- | 19,47 | 153  | 6,01  | 3,24  |
| 179 | 56 | F | Cohabiting seronegative | -- | -- | 20,73 | 74,7 | 4,38  | 4,73  |
| 129 | 14 | M | Cohabiting seronegative | -- | -- | 21,59 | 167  | 5,90  | 3,66  |
| 110 | 34 | F | Cohabiting seronegative | -- | -- | 22,46 | 136  | 2,27  | 9,88  |
| 304 | 17 | M | Cohabiting seronegative | -- | -- | 24,46 | 265  | 5,01  | 4,89  |

|      |    |   |                         |    |    |       |      |        |       |
|------|----|---|-------------------------|----|----|-------|------|--------|-------|
| 845  | 66 | M | Cohabiting seronegative | -- | -- | 24,82 | 966  | 2,03   | 12,20 |
| 303  | 50 | F | Cohabiting seronegative | -- | -- | 33    | 129  | 4,56   | 7,23  |
| 746  | 38 | M | Non-COVID sympytomatics | -- | -- | 5,17  | 50,4 | 16,87  | 0,31  |
| 743  | 23 | F | Non-COVID sympytomatics | -- | -- | 10,17 | 200  | 1,41   | 7,23  |
| 679  | 35 | F | Non-COVID sympytomatics | -- | -- | 10,29 | 185  | 12,72  | 0,81  |
| 817  | 20 | F | Non-COVID sympytomatics | -- | -- | 13,41 | 174  | 2,75   | 4,87  |
| NS40 | 46 | M | Non-COVID sympytomatics | -- | -- | 14,35 | 94,3 | 9,65   | 1,49  |
| 687  | 71 | M | Non-COVID sympytomatics | -- | -- | 15,45 | 181  | 1,30   | 11,91 |
| 854  | 33 | F | Unexposed seronegative  | -- | -- | 3,18  | 195  | 0,64   | 5,00  |
| 768  | 49 | F | Unexposed seronegative  | -- | -- | 4,13  | 45,7 | 0,88   | 4,71  |
| 847  | 62 | M | Unexposed seronegative  | -- | -- | 5,45  | 268  | 59,24  | 0,09  |
| 851  | 34 | M | Unexposed seronegative  | -- | -- | 6,82  | 162  | 14,12  | 0,48  |
| 850  | 26 | M | Unexposed seronegative  | -- | -- | 7,27  | 199  | 124,37 | 0,06  |
| 628  | 39 | M | Unexposed seronegative  | -- | -- | 7,79  | 215  | 6,17   | 1,26  |
| CBM2 | 68 | F | Unexposed seronegative  | -- | -- | 8,29  |      | na     |       |

|      |    |   |                        |    |    |       |      |       |       |
|------|----|---|------------------------|----|----|-------|------|-------|-------|
| 765  | 33 | F | Unexposed seronegative | -- | -- | 8,46  | 54,7 | 4,83  | 1,75  |
| 781  | 78 | F | Unexposed seronegative | -- | -- | 9,55  | 10,2 | 3,37  | 2,83  |
| 968  | 46 | M | Unexposed seronegative | -- | -- | 9,81  | 175  | 73,84 | 0,13  |
| CBM3 | 30 | F | Unexposed seronegative | -- | -- | 10,2  |      | na    |       |
| 848  | 62 | F | Unexposed seronegative | -- | -- | 11,14 | 165  | 0,99  | 11,29 |
| 95   | 64 | M | Unexposed seronegative | -- | -- | 13,11 | 107  | 64,34 | 0,20  |
| CBM4 | 30 | F | Unexposed seronegative | -- | -- | 13,49 |      | na    |       |
| 969  | 14 | M | Unexposed seronegative | -- | -- | 15,36 | 168  | 6,08  | 2,53  |
| 230  | 56 | M | Unexposed seronegative | -- | -- | 15,81 | 180  | 53,23 | 0,30  |
| 676  | 52 | F | Unexposed seronegative | -- | -- | 15,91 | 162  | 16,32 | 0,97  |
| 778  | 66 | F | Unexposed seronegative | -- | -- | 15,91 | 140  | 4,99  | 3,19  |
| 243  | 40 | M | Unexposed seronegative | -- | -- | 17,43 | 76,1 | 72,71 | 0,24  |
| 42   | na | M | Unexposed seronegative | -- | -- | 19,65 | 93,3 | 25,94 | 0,76  |
| 388  | 13 | M | Unexposed seronegative | -- | -- | 32,38 | 83,2 | 19,82 | 1,63  |
| 132  | 56 | F | Unexposed seronegative | -- | -- | 34,16 | 117  | 17,35 | 1,97  |

|     |    |   |                           |    |    |      |    |       |      |
|-----|----|---|---------------------------|----|----|------|----|-------|------|
| 747 | 29 | M | Unexposed<br>seronegative | -- | -- | 38,9 | 99 | 14,75 | 2,64 |
|-----|----|---|---------------------------|----|----|------|----|-------|------|
